# Supplementary material for: The protective mechanism of a debranched corn starch/konjac glucomannan composite against dyslipidemia and gut microbiota in high-fat-diet induced type 2 diabetes
Source: Royal Society of Chemistry journal article supplement (doi:10.1039/d1fo01233a), 2021-01-01
Supplement: d1fo01233a1.pdf [file d1fo01233a1.pdf]

1 **Appendix A. Supplementary material**

2 **Table S1**

3 The body weight of mice of different group from 0<sup>th</sup> to 5<sup>th</sup> week.

| Time | Body weight (g) |              |              |              |              |
|------|-----------------|--------------|--------------|--------------|--------------|
| (w)  | BCD             | HFD          | MET          | DCS          | DCSK         |
| 0    | 25.20 ± 1.95    | 25.12 ± 0.91 | 25.05 ± 1.73 | 24.33 ± 1.44 | 23.75 ± 1.61 |
| 1    | 23.80 ± 1.31    | 25.72 ± 0.54 | 25.04 ± 1.45 | 25.29 ± 1.54 | 23.55 ± 1.28 |
| 2    | 23.56 ± 1.58    | 25.99 ± 0.93 | 24.94 ± 1.37 | 24.28 ± 0.43 | 23.40 ± 1.53 |
| 3    | 23.79 ± 1.24    | 26.12 ± 0.90 | 24.75 ± 1.13 | 25.40 ± 2.07 | 22.71 ± 1.77 |
| 4    | 23.81 ± 1.37    | 25.92 ± 1.12 | 24.64 ± 1.51 | 25.50 ± 1.97 | 23.29 ± 1.89 |
| 5    | 23.90 ± 1.01    | 26.22 ± 0.53 | 24.10 ± 1.06 | 25.45 ± 1.48 | 23.1 ± 1.28  |

4 Each value was represented as mean ± SD (n = 8).

5 **Table S2** The OPLS-DA parameters of fecal samples of mice of different groups in the  
6 positive model.

| Group       | A | R <sup>2</sup> X (cum) | R <sup>2</sup> Y (cum) | Q <sup>2</sup> (cum) |
|-------------|---|------------------------|------------------------|----------------------|
| BCD VS HFD  | 3 | 0.524                  | 0.994                  | 0.861                |
| MET VS HFD  | 2 | 0.514                  | 0.990                  | 0.906                |
| DCS VS HFD  | 2 | 0.545                  | 0.995                  | 0.962                |
| DCSK VS HFD | 2 | 0.522                  | 0.996                  | 0.961                |

7 Note: A, the number of principal components; R<sup>2</sup>X, the interpretation rate of the X  
8 matrices of the built model; R<sup>2</sup>Y, the interpretation rate of the Y matrices of the built  
9 model; Q<sup>2</sup>, the projection ability of the model.

10 **Figure Captions**

11 **Fig. S1** Effects of DCS and DCSK on blood glucose level in T2D mice. Note: # $p < 0.05$

12 vs the BCD group, \* $p < 0.05$  vs the HFD group.

13 **Fig. S2** Rarefaction curve (top) and rank abundance (bottom) of intestinal microbiota

14 of the four experimental groups on otu level.

15 **Fig. S3** Principal coordinates analysis (PCoA) of the differences in structure of

16 intestinal microbiota among the five experimental groups based on weighted (left) and

17 unweighted unfrac distance (right).

18 **Fig. S4** The OPLS-DA score plot from BCD, HFD, MET, DCS and DCSK groups in

19 the positive mode.

20 **Fig. S1**

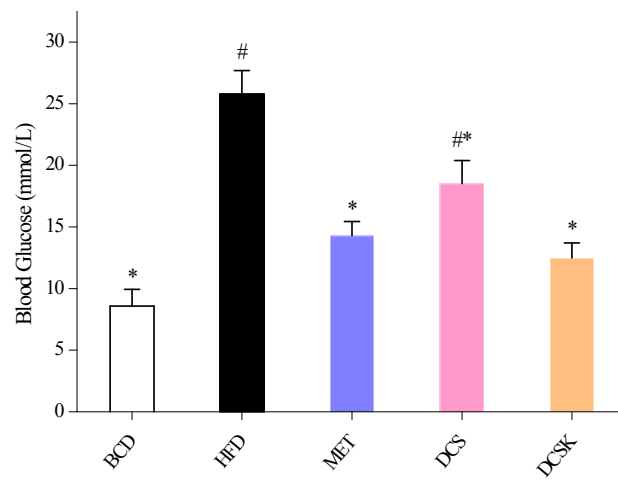

21

22 **Fig. S1** Effects of DCS and DCSK on blood glucose level in T2D mice. Note: # $p < 0.05$

23 vs the BCD group, \* $p < 0.05$  vs the HFD group.

24 **Fig. S2**

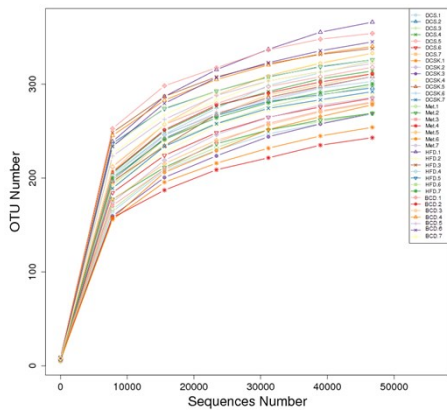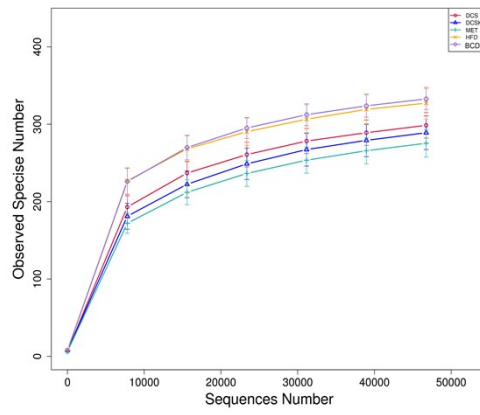

25

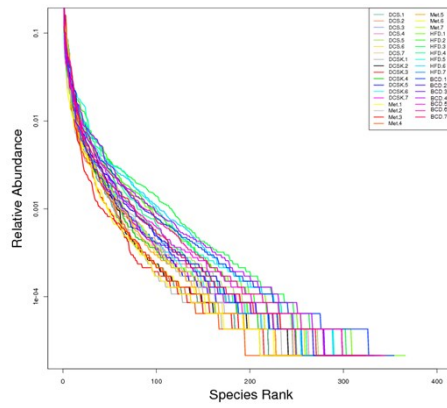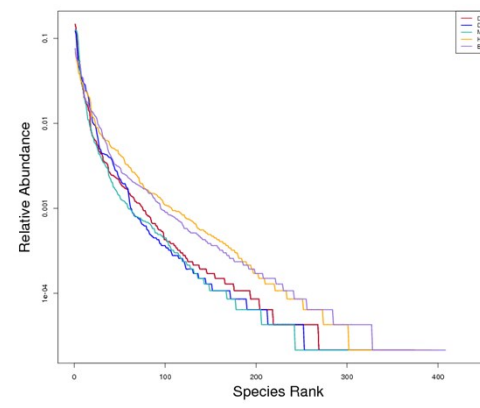

26

27 **Fig. S2** Rarefaction curve (top) and rank abundance (bottom) of intestinal microbiota

28 of the four experimental groups on otu level.

29 **Fig. S3**

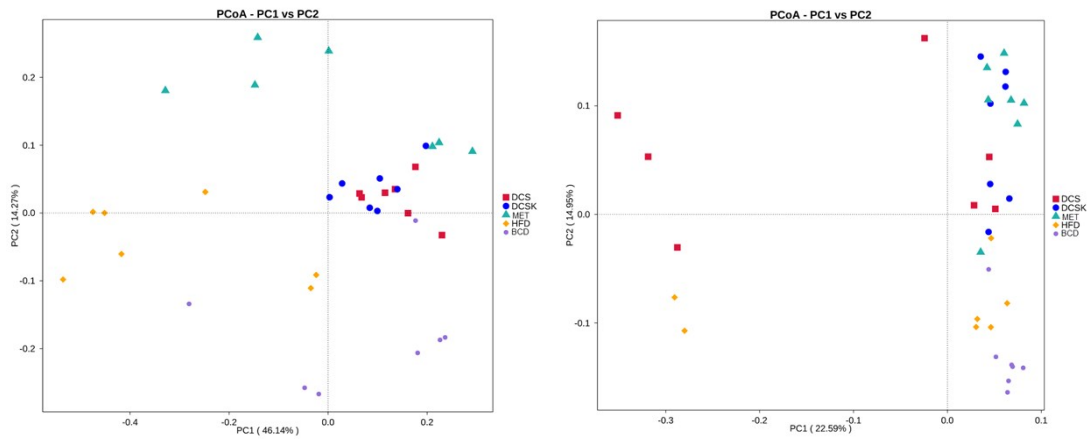

30

31 **Fig. S3** Principal coordinates analysis (PCoA) of the differences in structure of  
32 intestinal microbiota among the five experimental groups based on weighted (left) and  
33 unweighted unifracs distance (right).

34 **Fig. S4**

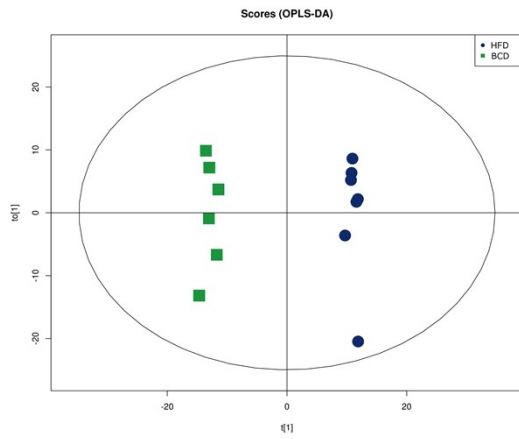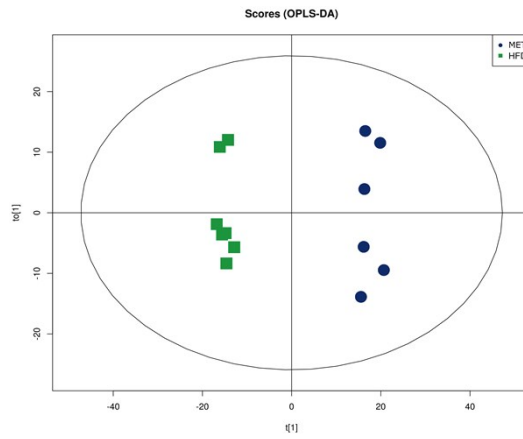

35

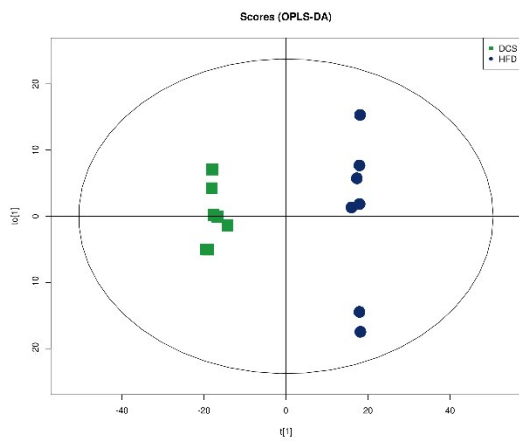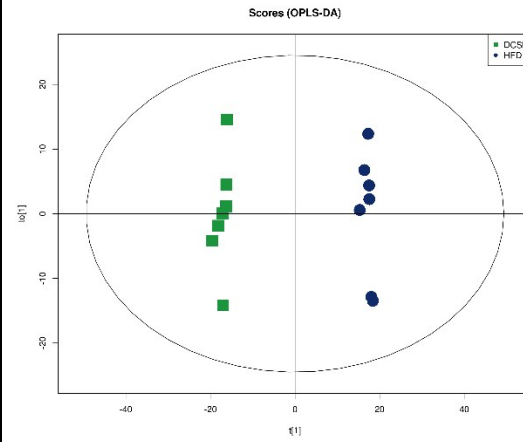

36

37 **Fig. S4** The OPLS-DA score plot from BCD, HFD, MET, DCS and DCSK groups in

38 the positive mode.
